# Supplementary material for: piRNA-directed cleavage of meiotic transcripts regulates spermatogenesis
Source: PubMed Central journal article supplement — Genes Dev. 2015 May 15;29(10):1032–44. doi: 10.1101/gad.260455.115 (PMC4441051; doi:10.1101/gad.260455.115), 2015-05-15

Tmem184c

5' -UUCUGAUUUUUGUACCGAAUCUUCUGAUU-3'  
 5' -...AGCAUGAUUGACACCUCGGAUUCACAGCAGGAGUCUUCUGAUUUUUGUACCGAAUCUUCUGAUUCAUCUAC...-3'  
 ||| || ||||| |||||  
 3' -AGUCCAGUCUCUUCUGAGAAGACUAAAU-5'

Als2cr12

5' -UGAAUGAGUCCAUCAGUGCUGUUUCUGAUA-3'  
 5' -...GUUUGAGUUACAGUCGGAAGAAAAAAGAAGAAAAUGAAUGAGUCCAUCAGUGCUGUUUCUGAUAACUUCG...-3'  
 || | | ||| |||||  
 3' -CCCGUCUCCAGUUUCCUUUACUUACUCAA-5'

Actr3

5' -UCUGUUUCUUGCUIUUAAAAGAAGGACAAGA-3'  
 5' -...AGCCGaugccugcccugcuuucugguuacuuacauucuguuucuuugcuuuAAAAGAAGGACAAGACUGUUG...-3'  
 | ||| |||||  
 3' -AGUCUCGACCAUAAAUGUAAGACAAAGAU-5'

Ncaph2

5' -UGUUAGAUCAGUGGGAAUGUGUCCUGUGG-3'  
 5' -...GAACACGUGUAUGCCUAACCCCAGAGGCUGCUUUUUGUUAGAUCAGUGGGAAUGUGUCCUGUGGAGCCUG...-3'  
 || | || ||||| |||||  
 3' -UCUCGACCGGUCGUAUCCGAACCUAUACAAUCUAGC-5'

Exoc8

5' -UGGGAUUAAAUAUGCUCCACUAUGCCUUG-3'  
 5' -...UCACAGAGGUCAUCCUGCCUCUGCCUCCUGAGUGCUGGGAUUAAAUAUGCUCCACUAUGCCUUGCUAAGU...-3'  
 |||| ||||| |||||  
 3' -ACGGAGAUGGAGGACUCACGACCCUAAUUU-5'

Psmb1

5' -UUACUAUGUUUACAACAUCAUUGGAGGACU-3'  
 5' -...CUGUCUACCAUCCUGUACUCACGGCGUUCUCCCUACUAUGUUUACAACAUCAUUGGAGGACUUGAUGA...-3'  
 | | ||| |||||  
 3' -UACGGACUUGGGAACUGGGAAUGAUACAU-5'

Zfp318

5' -UGAGUUUGAACCUUGAGACCCACAUAUUGG-3'  
 5' -...UUUAGCAAAAACACUUCUGACAAGCCUGAGGCCUGAGUUUGAACCUUGAGACCCACAUAUUGGAAAGAC...-3'  
 ||||| ||||| |||||  
 3' -CAUACUGUUCGUACUCCUGGACUCAAACUA-5'

Cyb5d2

5' - ...UGAACCGGAGCCACAUACAUGCUAGGCAAGCACUUUACCAACUGAGCUAUAUCCCUAGGUCCUUG-3'  
5' -UACCAACUGAGCUAUAUCCCUAGGUCCUUG-3'  
|| || | | ||| |||||||||||||  
3' -AAGCACGAUCCGUUCGUGAAAUGGUUGACU-5'

Nop16

5' - ...UCACAGAGAUCACCUGCCUCUGCCUCUCAAGUGCUGGGAUUAAAGGCGUGCACCACCACCACCU-3'  
5' -UGGGAUUAAGGCGUGCACCACCACCACCU-3'  
|||| ||||| |||||||||||||||||  
3' -ACGGAGAGGGAGAGUUCACGACCCUAAUUU-5'

Osbp111

5' - ...CAGAAGUAACGUCUCUUGCAGCAUCUGUGUUCUUCUGUCCAUAGCUGAAGUGUUCACUGCUC-3'  
5' -UCUGUCCAUAGCUGAAGUGUUCACUGCUC-3'  
| ||||| || |||||||||||||  
3' -UUAGUGGUAGACGAAAGGAAAGACAGGUAU-5'

Mdn1

5' - ...AGUCUAGUGAGGCUGUGGGGUCACUGGAGCUCUUACACAGCUGUUUGAAGCUCAGAGCUCUGAUUCUA...-3'  
5' -UACACAGCUGUUUGAAGCUCAGAGCUCUG-3'  
| || |||||||||||||  
3' -GCCUUGUAUACUUCAGGAAUGUGUCGAU-5'

BC049730

5' - ...UUACUGACCUGGAUGUUUGGGCUCUAGCCUUUGUUUACAGAGAUCUGUCCUCUGCUGAACCCTAUUCCU...-3'  
5' -UUUACAGAGAUCUGUCCUCUGCUGAACCCTAUUCCU-3'  
| ||||||||| |||||||||  
3' -UAGGUCGGAUCGGGAGACAAAUGUCUCU-5'

Fam178a

5' - ...UGAAGAAAGUUUAGGUUACACCUUAGAGAGUGAUGAGGAAGAGGAAACACUAAAAUCACUGGAAGAAUAA...-3'  
5' -AGGAAGAGGAAACACUAAAAUCACUGGAAGA-3'  
| ||| | || |||||||||  
3' -UCUCCUCUCCUCCUCCUCCUCCUCCU-5'

Lrrc61

5' - ...UUGGGGAGGUUUUGAAGGUUUGACCUUGAUGGAGGAAGUACGUCAGUGGGCAGGCUUUAAGAUUUUAAAA...-3'  
5' -AAGUACGUCAGUGGGCAGGCUUUAAGAU-3'  
| | |||||||||||||



I II III IIII II IIIIIIIIIII  
 3'-CCGGAGGUAGAGGGUCCCCGACCCUAAUGU-5'

Mrps7

5'-UACAGACAUAGGUGCAGACAAAACAUCUUAU-3'  
 5'-. . . CUUCUGACCUCUGGGCACCAGGCGUGCAUAUGUAUACAGACAUAGGUGCAGACAAAACAUCUAUACGUAC. . .-3'  
 II IIII IIII IIIIIIIIIIIII  
 3'-UGAUCCGUGUGUGUGUCAUAUGUCUGUAU-5'

Exoc8

5'-GCUGGGAUUAAAUAUGCUCCACUAUGCCU-3'  
 5'-. . . ACUCACAGAGGUCAUCCUGCCUCUGCCUCCUGAGUGCUGGGAUAAAUAUGCUCCACUAUGCCUUGCUAA. . .-3'  
 IIIIII IIIIIIIII IIIIIIIIIIIII  
 3'-GGACGGAGACGGGAGCUCACGACCCUAAU-5'

Exoc8

5'-UGGGAUUAAAGACAUGCUCAGCUAGGUGUG-3'  
 5'-. . . ACGGGUCACUCUAGUCCUCUGCCUCCUGAGUGCUGGGAUAAAAGACAUGCUCAGCUAGGUGUGGUGACA. . .-3'  
 III IIIIIII IIIIIIIIIIIIIII  
 3'-ACGGAGAUGGAGGACUCACGACCCUAAUUU-5'

Trim14

5'-UCAUCUUCUACACUAAAACCAGGGUGGGCA-3'  
 5'-. . . AGGGUUCUUGUCUGAGUCUGCAUCCUCUUGCUUCUACUCUUCUACACUAAAACCAGGGUGGGCAUCCUGA. . .-3'  
 III II | | II IIIIIIIIIIIIIII  
 3'-AGGACCAAGGGUACAAGAAGUAGAAGAU-5'

Ddx11

5'-UGCAGCUAGAAGUCCCCAUCAUAGGAGGACCC-3'  
 5'-. . . UUGUCACUAGUGUAGGGCUUUAGCAUACACUAAAAGUGCAGCUAGAAGUCCCCAUCAUAGGAGGACCCAGAG. . .-3'  
 II IIIIIIIII IIII IIIIIIIIIIIIIII  
 3'-CCUCAAUUCGUACGUGACUUCACGUCGAUCU-5'

Shoc2

5'-UUCUUUGGAUUUUGGAACUUGGACCAGUA-3'  
 5'-. . . UAAGCUGAAUAUGAAGGACAAUCAGUUAACAUCACUCCUUUGGAUUUUGGAACUUGGACCAGUAUGGUAG. . .-3'  
 | IIIIII | IIIIIIIIIII  
 3'-UGGUUAGUACAAUUGUCGAGAAGGAAACCU-5'

Tapbp

5'-UGGGAUUAAAGGCGUGCGCCACCACCGCUG-3'



5' - ...ACUCAGAAAUCCGCCUGCCUCUGCCUCCAGGUGCUGGGAAUAAAAGGCGUGCGCCACCACCGCUG-3'  
5' -UGGGAUUAAAAGGCGUGCGCCACCACCGCUG-3'  
||||| |||||||| ||||||||  
3' -GAGGAGACAGAGGGUCCACGACCCUAAUUU-5'

Prok2

5' - ...UUUCCUGCACCCAUCUGGCCACUGGCCUUUCAGUUCUGCUGUUUAAACUGGUGGGAGGACAAAAU-3'  
5' -CUGCUGUUUAAACUGGUGGGAGGACAAAAU-3'  
|| | ||||||||  
3' -CCCUCUUUAGGUCAAGACGACAAAA-5'

Mob2

5' - ...UGUUUGUAGUGAAGAGCCUUUGGAGUCAUUCAUUCAUUAACAACAUAUUUUAUUGGACUGAUGUUU-3'  
5' -AUUCAACAACAUAUUUUAUUGGACUGAUGUUU-3'  
| | ||||||| ||||||||  
3' -UCAGUAGGUCGGUAGUAGGUAGUUGUUU-5'

Kat6a

5' - ...UUCAAUCAGGCAGCUCCUUUCUGCAAGCCUUCUGGACUGUAGAACAUAUUUGAAGAAAAAAAAUAUGU...-3'  
5' -UGUGACUGUAGAACAUAUUUGAAGAAAAAAAA-3'  
| |||| | ||||||||  
3' -UACAGGGUCAUGUUCUGUUAAACACUGACAC-5'

Qsox2

5' - ...GAAUAUUUGAGGAAUUGGCUAAGGAGUCCAUGGAUUCUGUGAAAACUCCAGACCAAGCUGUUCUCUGGCU...-3'  
5' -UUCUGUGAAAACUCCAGACCAAGCUGUUCU-3'  
||| || |||||||| ||||||||  
3' -AACAGAACCUCAGGUACUUAAGACACUUC-5'

Als2cr12

5' - ...AAAGUUUGAGUUACAGUCGGAAGAAAAAAGAAGAAAAUGAAUGAGUCCAUCAGUGCUGUUUCUGAUAACU...-3'  
5' -AAAUGAAUGAGUCCAUCAGUGCUGUUUCU-3'  
| | |||||| ||||||||  
3' -UCUGUCUUCUCUUUCUCCUUUACUACU-5'

Alkbh4

5' - ...CAGUGGUGUCCAUGUCUCCAGAGGCCUGGAGCCUGCUUCUCUGCUCAGCCCCUCCGUCAGAC-3'  
5' -CUGCUUCUCUGCUCAGCCCCUCCGUCAGAC-3'  
| || |||| | ||||||||  
3' -CCCUCUUUCUGGACACUAGGACGAAGAGU-5'

Plekha8

5' - ...UCCUUUUUCCAUUUUUUUUUUAGUUUUUUUCUUAUUUACAUUUCAAUUGCUAUCCUGAACAGUU-3'  
| | | | | | | | | | | | | | | | | |  
3' -UUUUAAUCUAUAAAAGAAGUAAAUGUAAAAG-5'

Rlf

5' - ...GGUUUUAUUGAUUGGGAUUUUUUGUUUGUUUGUUUGUUUUAUUAAAAAAUUGGAACUGUACUCU-3'  
| | | | | | | | | | | | | | | | | |  
3' -CUCACUGUAAGGAACAAAAAACAUAUAAA-5'

Zfp113

5' - ...ACUCAGAAAUCCACCUGCCUCUGCCUCCAAGUGCUAGGAUUAAAGGAUGCGCCACCACUGCCC-3'  
| | | | | | | | | | | | | | | | | |  
3' -ACGGAGACGGAGGGUUCACGAUCCUAAUUU-5'

Vapa

5' - ...UUCAGAGAUAAUGUCACCAGUCCUCUCCUUCUCUUCUGGUUGUAAUUGCAGCCAUUUUCAUUGG-3'  
| | | | | | | | | | | | | | | | | |  
3' -AGACCCCGGAGGACGAAGAGAAGACCAACAU-5'

Cep68

5' - ...UUACUGUUUUGUUUUUUGGGUUUUUUGAGACAAGGUUUCUCUGUGUAACAGAACCCUGGCUGUACCG-3'  
| | | | | | | | | | | | | | | | | |  
3' -AUAAAAAACUCUGUCCCAAAGAGACACAU-5'

Ago2

5' - ...AGAAUGCCUCCGUCCAGAUUGUCAGACUUGGAUUUUGAGCUGCAGGCCUGUAUGAGACCCCAGU-3'  
| | | | | | | | | | | | | | | | | |  
3' -GGUCUACAGUCUGAACCUAAAACUCGACGU-5'

Ssu72

5' - ...CAUCCUCAGCAAGCGAGGUUUCAGUGCCGCUCCUUUGGAACAGGAACUAUGUGAAGCUCCAG-3'  
| | | | | | | | | | | | | | | | | |  
3' -AUGGAGUACGUAGGGUAGGAAACCUUGUCG-5'

Tkt12

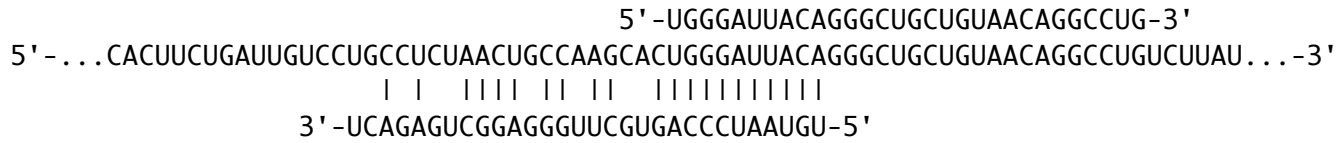

Ago2

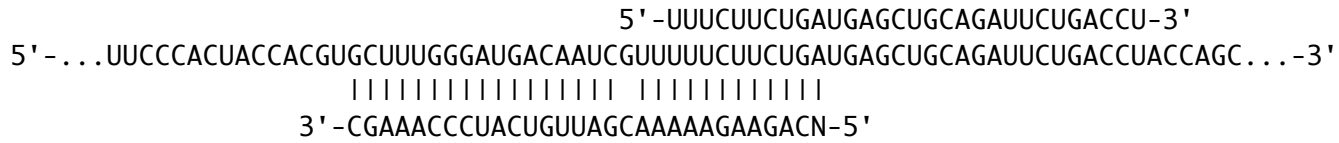

Ago2

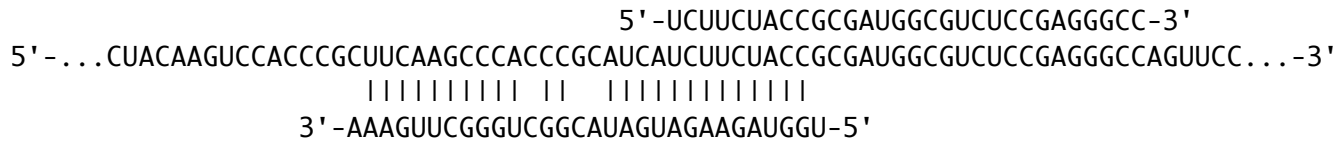

Ago2

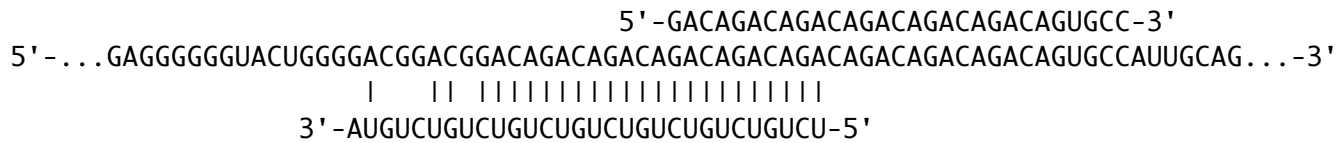

Alyref

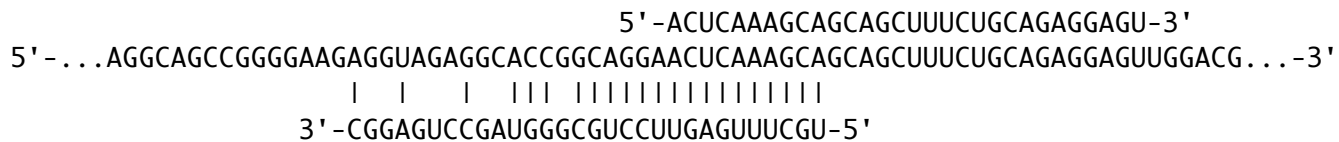

Dcaf10

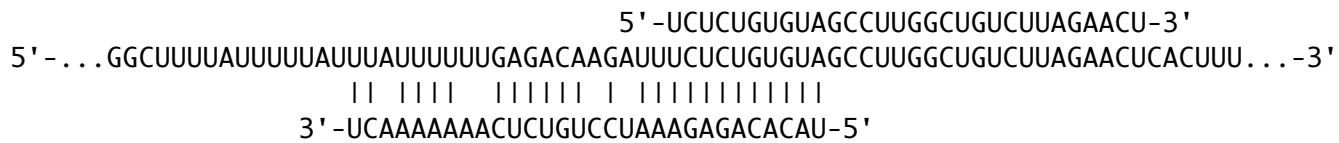

Klh124

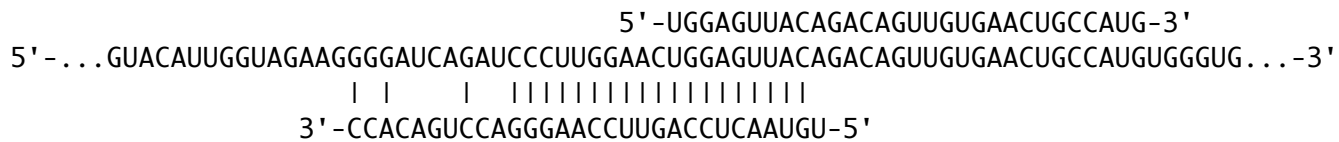



Cyb5d2

5' - ...ACUCAGAAAUCCACCUUGUCUCUGCCUCCCAAGUGCUAGGAUAAAAGGCGUGUGCCACCACGCCCA-3'  
5' -UAGGAUAAAAGGCGUGUGCCACCACGCCCA-3'  
|| |||||  
3' -ACGGAGACGGAGGGUUCACGAUCCUAAUUU-5'

Zbtb9

5' - ...GGACUUACAAAUGACUACUGGUGCUCUCUAGUGAUUUUCUAGGACAAGAUAGCCCCUGCUGCUGCUGGACUC...-3'  
5' -UUCUAGGACAAGAUAGCCCCUGCUGCUGCU-3'  
|| ||| || | |||||  
3' -GGUCGGACCAGAUGUCUCAAAAAGAUCCUGU-5'

Ccdc36

5' - ...CUGGUCUACAGAGCGAAUUCAGGACAGCCAGAGCUACACAGAGAAAUCUUGUCCUGAAAAGCCAAAACA...-3'  
5' -UACACAGAGAAAUCUUGUCCUGAAAAGCCA-3'  
| | ||||| |||||  
3' -GAGAGGUCCUGUCGGUCUCGAUGUGUCUCU-5'

Ptpn12

5' - ...CAUGGAGAUUCAGUAAGUGCCUUGGAACAAUUAUUGAAUUCUCUAGCUCGUGUGUGUUACUUUAAA...-3'  
5' -AAUUCUCUUAGCUCGUGUGUGUUACUUUAAA-3'  
|||| || ||| | |||||  
3' -GACAGGAGUCUCGUUUUGACUUAAGAGAAU-5'

Phf23

5' - ...AGCCUCUGUGGGACGUGGAUCCACCUCUCCUGUGCUAAGAUUAAGAAGACCAACGUUCCCGACUU-3'  
5' -UAAGAUUAAGAAGACCAACGUUCCCGACUU-3'  
| || ||| || || |||||  
3' -UUUGAGUCAGAGGGGUCACGAUUCUAAUUU-5'

Zfp382

5' - ...UCAUAGAGAUCCGCCUGCCUCGCCUCCCAAGUGCUGGGAUAAAAGGUCUAUGCCACCACAACUGGCAGAU...-3'  
5' -UGGGAUAAAAGGUCUAUGCCACCACAACUG-3'  
|||| |||||  
3' -AUGGAGACGGAGGGUUCACGACCCUAAUUU-5'

Hnrnp12

5' - ...GGAGGACGACGACGAGGAGGAGGACGAGGAGGCGCUGCUUAGGACGAAGACGAGGAACCACCAC-3'  
5' -UGCUUGAGGACGAAGACGAGGAACCACCAC-3'  
||||||| || |||||



| III IIIIIIIII IIIIIIIIIII  
3' -AGGAGGACGGAGGACUCAUGACCCUGAUUU-5'

Ptchd3

5' -UGAAAAUGUCUUAGUGAAAACCAUUAACUU-3'  
5' -...UGUAGGAUUAACAAGGCACAUUGUUAUACAUGUAGUAGAAAUGUCUUAGUGAAAACCAUUAACUUUGUCCAA...-3'  
| IIIII IIIIIIIIIII IIIIIIIIIII  
3' -UUUUAUGUAAUUAUGUACAUAUUUUACAG-5'

Sdhaf2

5' -UGUAACUCUAGUUUCAAGAGGAUCUGACAC-3'  
5' -...AGUCCUAGCACCACAAAAGCAGCUCACAACUGUCUGUAACUCUAGUUUCAAGAGGAUCUGACACAGAUGC...-3'  
| | IIIIIIIIIII IIIIIIIIIII  
3' -CAUCCAUCGAGUGUUGACAGACAUUGAGAU-5'

Cdr2

5' -ACUUUCACAAACACUAACAUUCAGAAGGAUG-3'  
5' -...ACUACUUGGAACUCCAAGGACUGCCUAACUAAAGUACUUUCACAAACACUAACAUUCAGAAGGAUGUUGAG...-3'  
| IIIII III | IIIIIIIIIII  
3' -UGAAAACACGGACUGAACUGAUGAAAGUGUG-5'

Ppfia1

5' -UGAAAAUGAAAUUGCAAUAAAAGACUCCAUGC-3'  
5' -...GAAGCCAGCUGUGCAUGACCUCAAUGACAACUUGAAAAUGAAAUUGCAAUAAAAGACUCCAUGCACCG...-3'  
| IIIIIIIII | | IIIIIIIIIII  
3' -CUACUGGAGAAACUUUUUGAACUUUUACUU-5'

Zfp397

5' -UCAAAAAACAAACAAAGAUAAAAAGAAAUG-3'  
5' -...CCAGGACAGCCAGGGCUAUACAGAGAAAACCCUGUCUAAAAAACAAACAAAGAUAAAAAGAAAUGAAAUG...-3'  
| IIIIIIIIIII IIIIIIIIIII IIIIIIIIIII  
3' -GAUACGUCUCUUUGGACAGAGUUUUUUGU-5'

BC027231

5' -UACAUCUUGUUCAAAAGCAAACAGGGGAAAAC-3'  
5' -...CCAGGCAGGCAUGGUGCAGAAGGAGCUGAGAGUUCUACAUCUUGUUCAAAAGCAAACAGGGGAAAACUGGC...-3'  
| IIIII IIIIIIIIIII IIIIIIIIIII  
3' -AGGUCCUCUCGACUCUCAAGAUGUAGAACU-5'

Cyb5d2

5' -UACCAACUGAGCUUAUCCCUAGGUCCUUG-3'

5' - ...UGAACCGGAGCCACAUAUAUGCUAGGCAAGCACUUUACCAACUGAGCUAUAUCCCUAGGUCCUUGAGCUUC...-3'  
    || || | | ||| |||||  
3' -AAGCACGAUCCGUUCGUGAAAUGGUUGACU-5'

Cyb5d2

5' -UAGGAUUAAAGGCGUGUGCCACCACGCCCA-3'  
5' - ...ACUCAGAAAUCCACCGUCUCUGCCUCCAAGUGCUAGGAUUAAAGGCGUGUGCCACCACGCCCAGCGCUC...-3'  
    || |||||  
3' -ACGGAGACGGAGGGUUCACGAUCCUAAUUU-5'

Mob2

5' -AUUCAACAAACAUUUUUAUUGGACUGAUGUUU-3'  
5' - ...UGUUUGUAGUGAAGAGCCUUUGGAGUCAUUCAUUCAUUCACAAACAUUUUUAUUGGACUGAUGUUUUGAUUU...-3'  
    | | |||||  
3' -UCAGUAGGUCGGUAAGUAGGUAAGUUGUUU-5'

Lrrc40

5' -AACCAUCAAAAUGAUUCUGUCCUGAGAC-3'  
5' - ...CUAAAUAACCGCGCAGCAAGAUAAGAUGAUAGAACCAUCAAAAUGAUUCUGUCCUGAGACUGCCA...-3'  
    || | | ||| |||||  
3' -CCACUUCUAGUGUUACUUCUUGGUUAGUU-5'

S1c43a2

5' -UCAGUUGGUAGCAUGUUUGCCUAGCUUACC-3'  
5' - ...UGUGGAUUGGCUCCAGGCCUGGGUGUGGAUGUAGCUCAGUUGGUAGCAUGUUUGCCUAGCUUACCCAAAGC...-3'  
    | ||| |||||  
3' -UUUAAGCGACGCCUACAUCGAGUCAACCAU-5'

AI597468

5' -UACCAACUGAGUUGCAUUCGUAGUGAAAUU-3'  
5' - ...GAACCCAGGGCUGCAUGCAUAGUAGGCAAGUACUGUACCAACUGAGUUGCAUUCGUAGUGAAAUUUCGUUCA...-3'  
    | | | |||||  
3' -UAGCACGAUCCGUUCGUGACAUGGUUGACU-5'

March5

5' -UACUAUUGCGACAUAUAGUUGGUAACUGAU-3'  
5' - ...GCUACCAGAAUUUUGUGUGGAGCCUUGUCUUUCUACUAUUGCGACAUAUAGUUGGUAACUGAUGUUCAG...-3'  
    | |||||  
3' -AGUCCACUACCUACAGGAACGAUGAUACGU-5'

Mgat2

5'-...GUGGAAGCUGCAUUUUUGUAUUGGGAAAGAGUCAAGUUCUCAAGAUUACACUGGGCCUUAUACUCU-3'  
5'-UUCUUCAAGAUUACACUGGGCCUUAUACUCU-3'  
| | | | | | | | | | | | | | | | | | | | | |  
3'-CUCCUCGGUUUUACAAUGUCAAGAAGUUCU-5'

Psm8

5'-...CGCACUGGCCUUGAAAACCCUCUGUAGCCAGAGGAUGACCUUGAACUCCUGAUUUUUUUUAUCUUCACUUUU...-3'  
5'-UGACCUUGAACUCCUGAUUUUUUUUAUCUUC-3'  
| | | | | | | | | | | | | | | | | | | | | |  
3'-UGAGUGAUACACCGUCUCCUACUGGAACUU-5'

Zkscan1

5'-...UAUAUGUAAGGGAGCCAGGCAAGGUGGUACA UCCUUUAUCCAGGACUUGGGAGGCUGGAACA-3'  
5'-UUUAAUCCCAGGACUUGGGAGGCUGGAACA-3'  
| | | | | | | | | | | | | | | | | | | | | |  
3'-UUCGUCACCACCGUGUAAGGAAAUAGGGU-5'

Mg11

5'-...UCCCUCGCUCCCGGAACCCUUCAGGGGUGUGUUCUGGAAAAGUGGGCACAUGAGCUAGAGCUGG-3'  
5'-UGGAAAAGUGGGCACAUGAGCUAGAGCUGG-3'  
| | | | | | | | | | | | | | | | | | | | | |  
3'-AGGGGUCGGUUGGAGACCUAAAAGAAGACCUUUUCAU-5'

Tdrd1

5'-...UAAGUAAAACAUUGACGUGGGUGGGUUUUGUUUUGUUUUCUGUUACUGGCAGUGUGAGUCAGCUC-3'  
5'-UUUCCUGUUACUGGCAGUGUGAGUCAGCUC-3'  
| | | | | | | | | | | | | | | | | | | | | |  
3'-UACCAAAAACAAAACAAAACAAAAGGACAAU-5'

Tb12

5'-...AAACACAGGAUGCAGACGGUGUUCUGCAAGCAAACUAGGAAAAAACACAGCCCUUGUGAAGCCA-3'  
5'-UAGGAAAAAACACAGCCCUUGUGAAGCCA-3'  
| | | | | | | | | | | | | | | | | | | | | |  
3'-UUUUGUGUCCGUCCUCCUUUGAUCCUUUUUU-5'

Ar114ep1

5'-...AUAGAGAAUAUUAUUUAUAUAUGUACACUUUAAGUCAAAUCUUUCUCUUGGAUACGUGUUG-3'  
5'-UCAACUUCUUUCUCUUGGAUACGUGUUG-3'  
| | | | | | | | | | | | | | | | | | | | | |  
3'-GAAUACAAUCUUGAAGAUUCAGUUUGAAGN-5'

Tb12



Ppp1cb

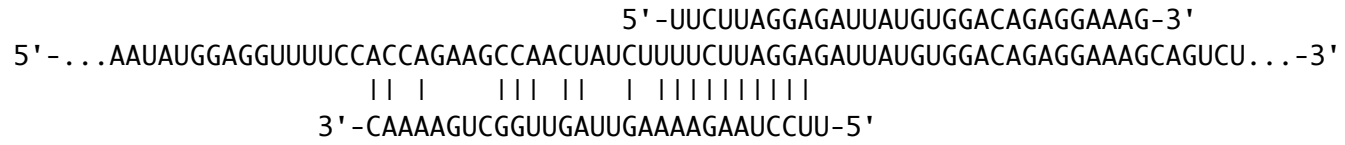

Ppfia1

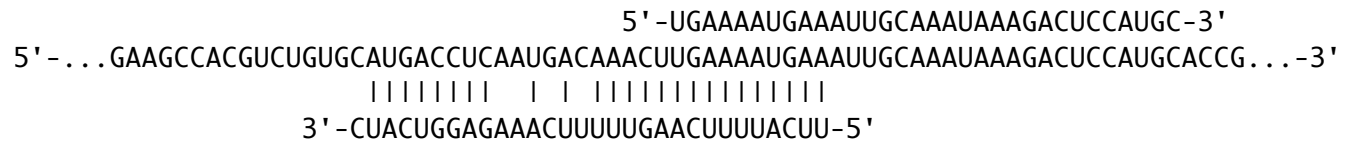

Psma8

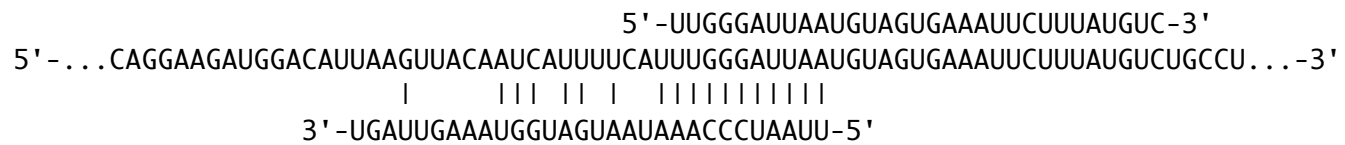

Supplement: supp_29.10.1032_FigS8_Cleavage_pattern_for_72_mRNA_targets.pdf [file supp_29.10.1032_FigS8_Cleavage_pattern_for_72_mRNA_targets.pdf]
